# Supplementary material for: Mitochondria as target to inhibit proliferation and induce apoptosis of cancer cells: the effects of doxycycline and gemcitabine
Source: Sci Rep. 2020 Mar 9;10:4363. doi: 10.1038/s41598-020-61381-9 (PMC7063048; doi:10.1038/s41598-020-61381-9)
Supplement: Supplementary file 1 — Supplementary Information. [file 41598_2020_61381_MOESM1_ESM.pdf]

**Supplementary information for:**

**Mitochondria as target to inhibit proliferation and induce apoptosis of cancer cells: the effects of doxycycline and gemcitabine**

**Sas N. Dijk<sup>1</sup>, Margherita Protasoni<sup>2</sup>, Marilena Elpidorou<sup>2</sup>, Albert M. Kroon<sup>2</sup> and Jan-Willem Taanman<sup>2,\*</sup>**

<sup>1</sup>Research Department of Surgical Biotechnology, Division of Surgery and Interventional Science, University College London, London, NW3 2PF, UK

<sup>2</sup>Department of Clinical and Movement Neurosciences, Queen Square Institute of Neurology, University College London, London, NW3 2PF, UK

\*Correspondence: Dr J.-W. Taanman, Department of Clinical and Movement Neurosciences, Queen Square Institute of Neurology, University College London, Royal Free Campus, Rowland Hill Street, London NW3 2PF, United Kingdom, Phone: +44-20-8016 8148, E-mail: j.taanman@ucl.ac.uk

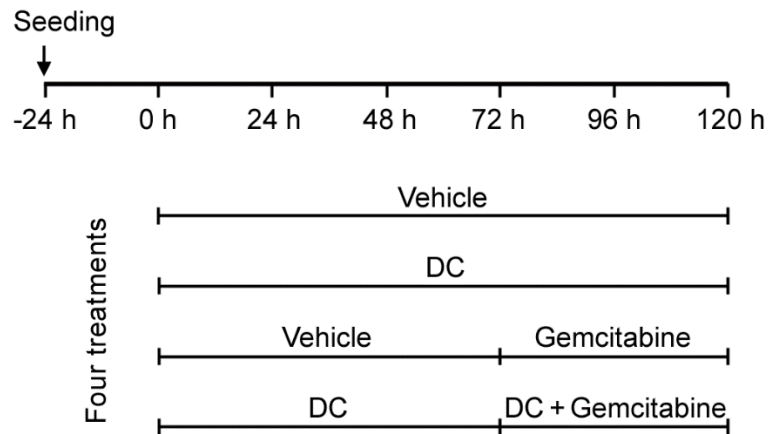

**Supplementary Figure S1.** Cell culturing and treatment scheme. Medium was changed every 24 h. DC, doxycycline.

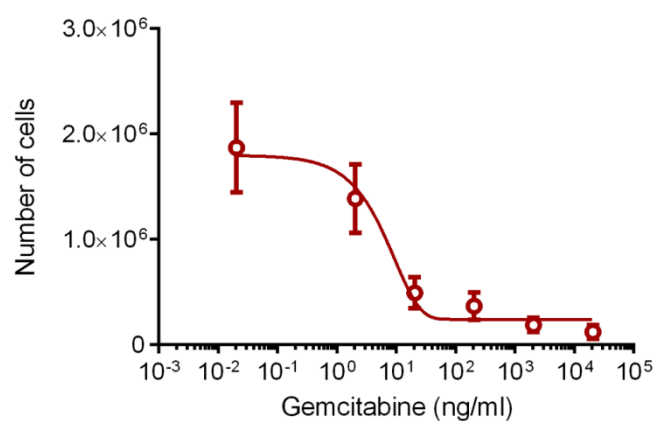

**Supplementary Figure S2.** Dose response curve for treatment of A549 cells with gemcitabine. To construct the dose-response curve,  $1.0 \times 10^4$  A549 cells were seeded on 10-cm tissue culture dishes at  $t=-24$  h. At  $t=72$  h and  $t=96$  h cells were treated with gemcitabine in fresh medium. Cells were counted at  $t=120$  h ( $n=3$ ). Symbols show mean number of cells. Error bars indicate standard deviations.

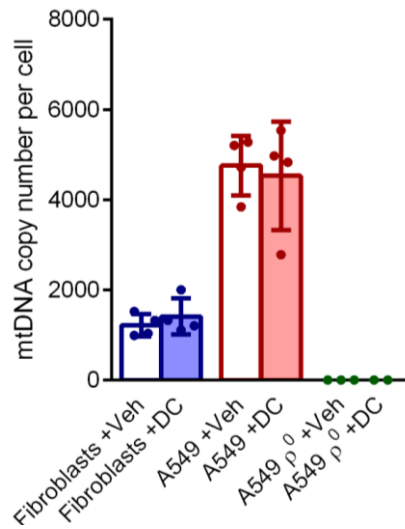

**Supplementary Figure S3.** Doxycycline has no effect on mtDNA copy number. Mean mtDNA copy number per cell after the cultures had been treated for 5 days with vehicle (Veh) or doxycycline (DC) (n=4). Error bars indicate standard deviations.

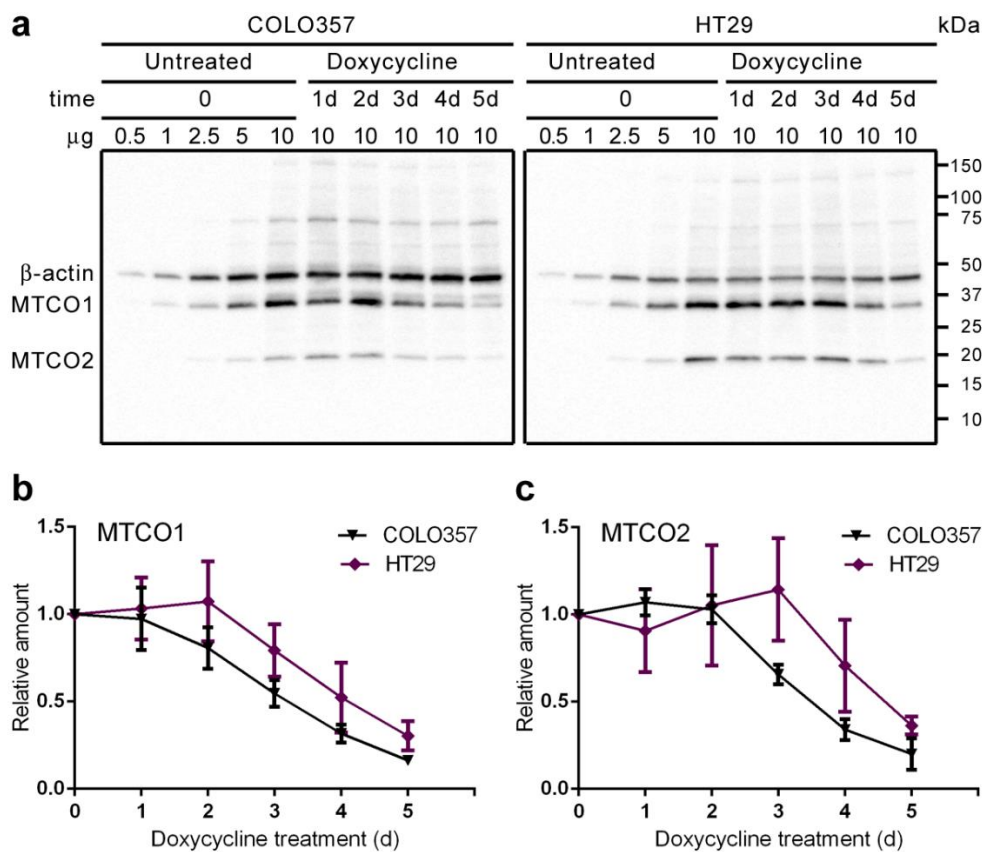

**Supplementary Figure S4.** Doxycycline decreases mitochondrial-encoded protein levels in COLO357 and HT29 cells. **(a)** Western blot images of samples from COLO357 and HT29 cells treated with doxycycline over a 5-day time period. To facilitate quantification, serial dilutions of untreated cells, harvested at t=0, were also applied. Blots were probed with antibodies against the mitochondrial-encoded proteins MTCO1 and MTCO2, and  $\beta$ -actin. Migration of protein standards is indicated on the right. **(b, c)** Mean amounts of MTCO1 and MTCO2 in the treated cells over a 5-day period relative to the amount in the cells at t=0 (n=3). Error bars indicate standard deviations.

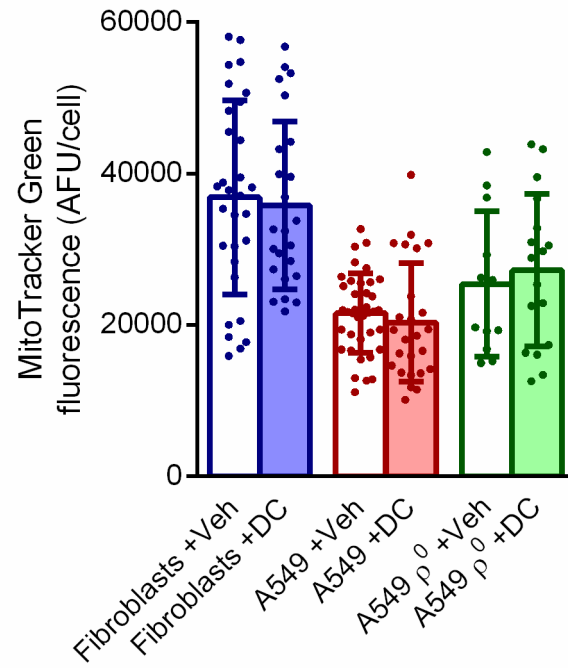

**Supplementary Figure S5.** Doxycycline has no effect on mitochondrial mass. Mean MitoTracker Green fluorescence per cell ( $n \geq 12$ ) in arbitrary fluorescent units (AFU). Error bars indicate standard deviations

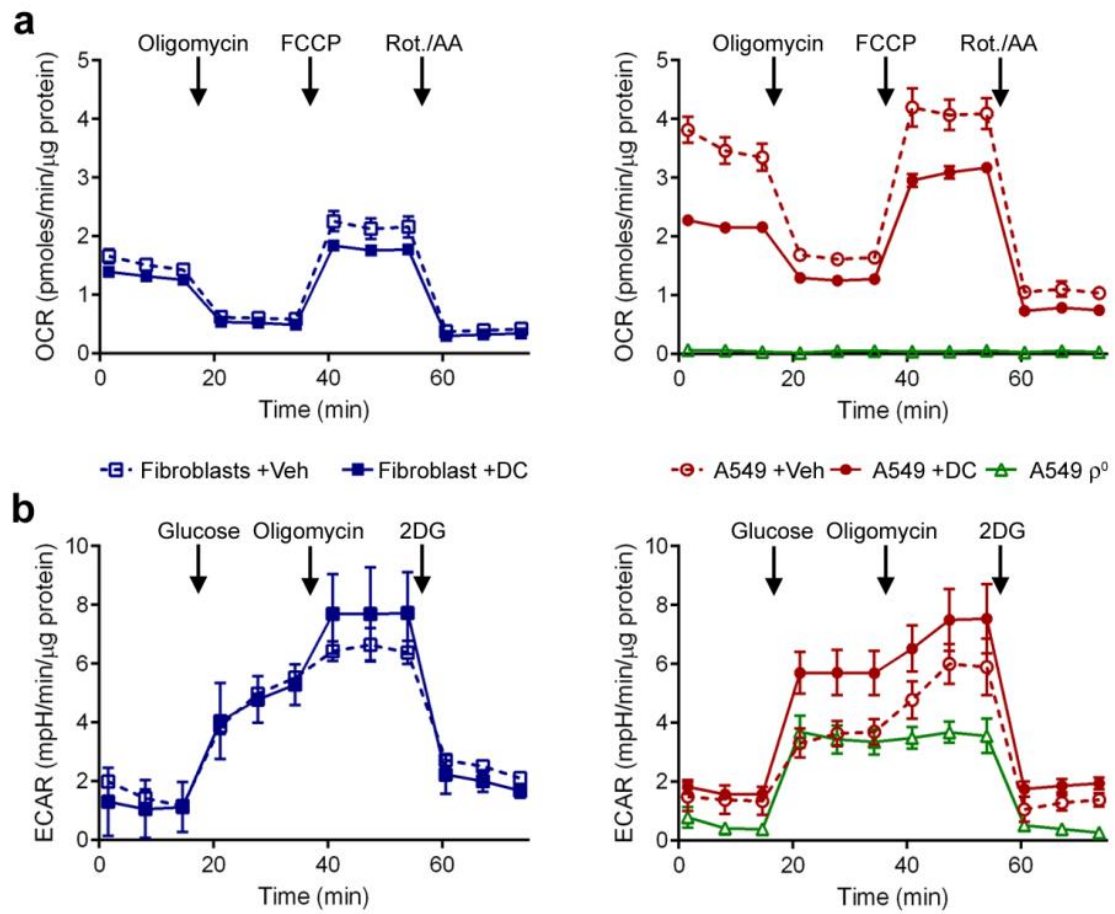

**Supplementary Figure S6.** Mitochondrial and glycolysis stress test profiles. **(a)** Oxygen consumption rates (OCR) of representative mitochondrial stress tests of fibroblasts and A549 cells treated with vehicle (Veh) or doxycycline (DC) for 5 days, and A549  $\rho^0$  cells. Oligomycin A, FCCP and rotenone/antimycin A (Rot./AA) were added sequentially to dissect oxidative phosphorylation function. **(b)** Extracellular acidification rates (ECAR) of representative glycolysis stress tests of fibroblasts and A549 cells treated with vehicle or doxycycline for 5 days, and A549  $\rho^0$  cells. Glucose, oligomycin A and 2-deoxyglucose (2DG) were added sequentially to dissect glycolytic function. Symbols represent mean values. Error bars indicate standard deviations of 3 technical repeats.

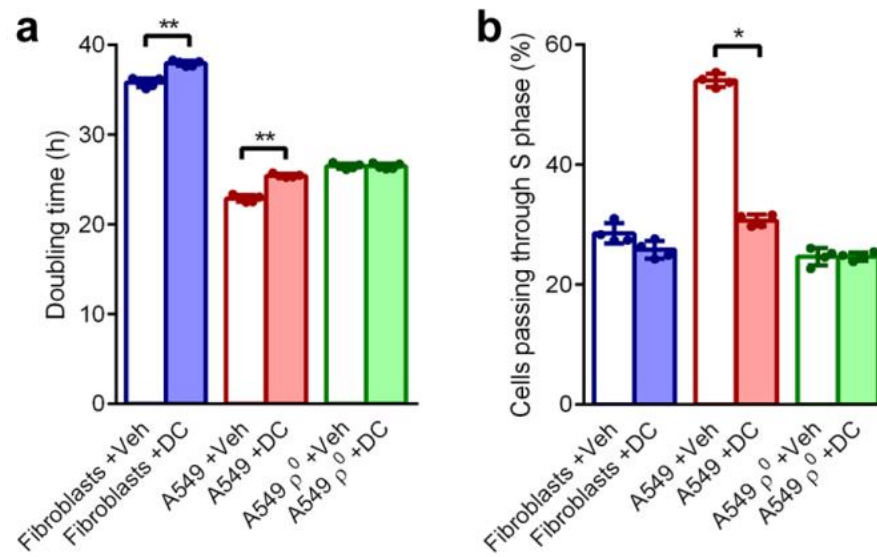

**Supplementary Figure S7.** Doxycycline decreases cellular proliferation. **(a)** Mean doubling time of cells over 5 days of culturing with vehicle (Veh) or doxycycline (DC) (n=5). **(b)** Mean percentage of cells passing through S-phase after the cultures had been treated for 5 days with vehicle or doxycycline (n=4). Error bars indicate standard deviations. Asterisks denote statistically significant differences (\* $p < 0.05$ ; \*\* $p < 0.01$ ).

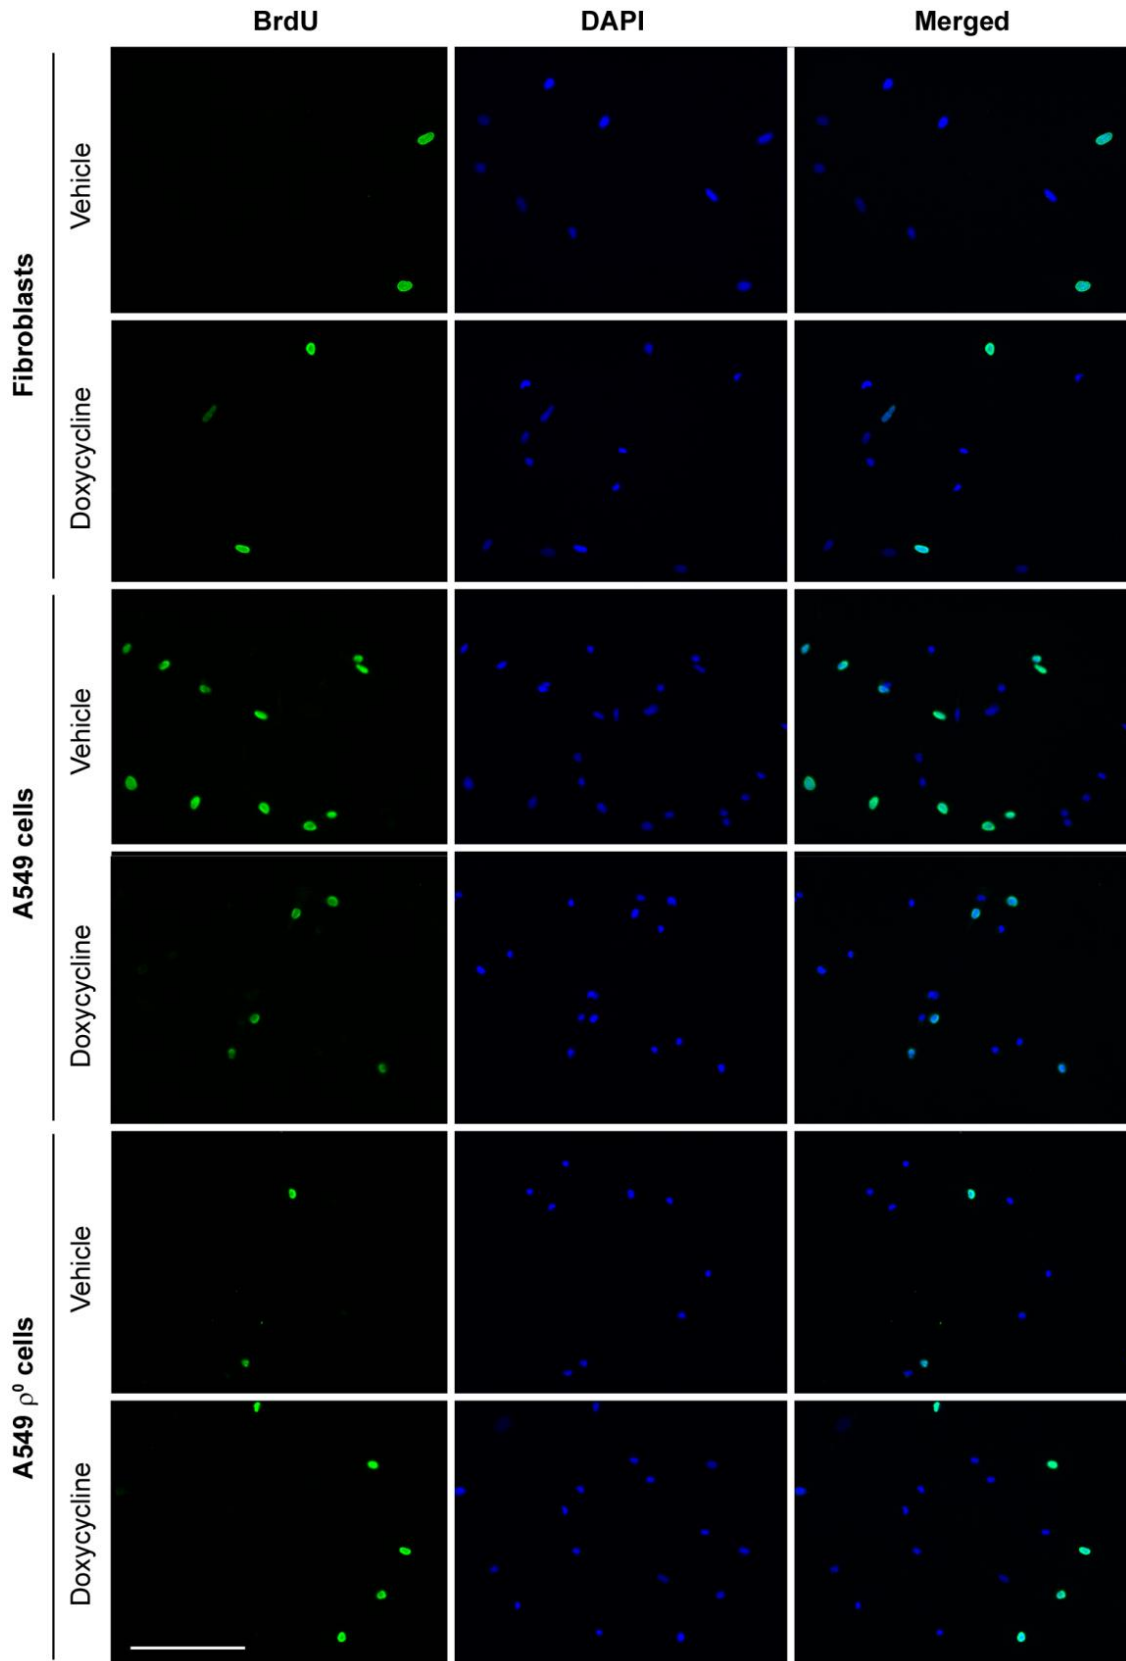

**Supplementary Figure S8.** Representative fluorescent micrographs of BrdU incorporation into replicating nuclear DNA. Fibroblast, A549 and A549  $\rho^0$  cultures were treated with vehicle or doxycycline for 5 days and with BrdU during the last 4 hours, followed by immunocytochemical staining of BrdU incorporation (green) and DAPI nuclear counterstaining (blue). Scale bar: 100  $\mu\text{m}$ .

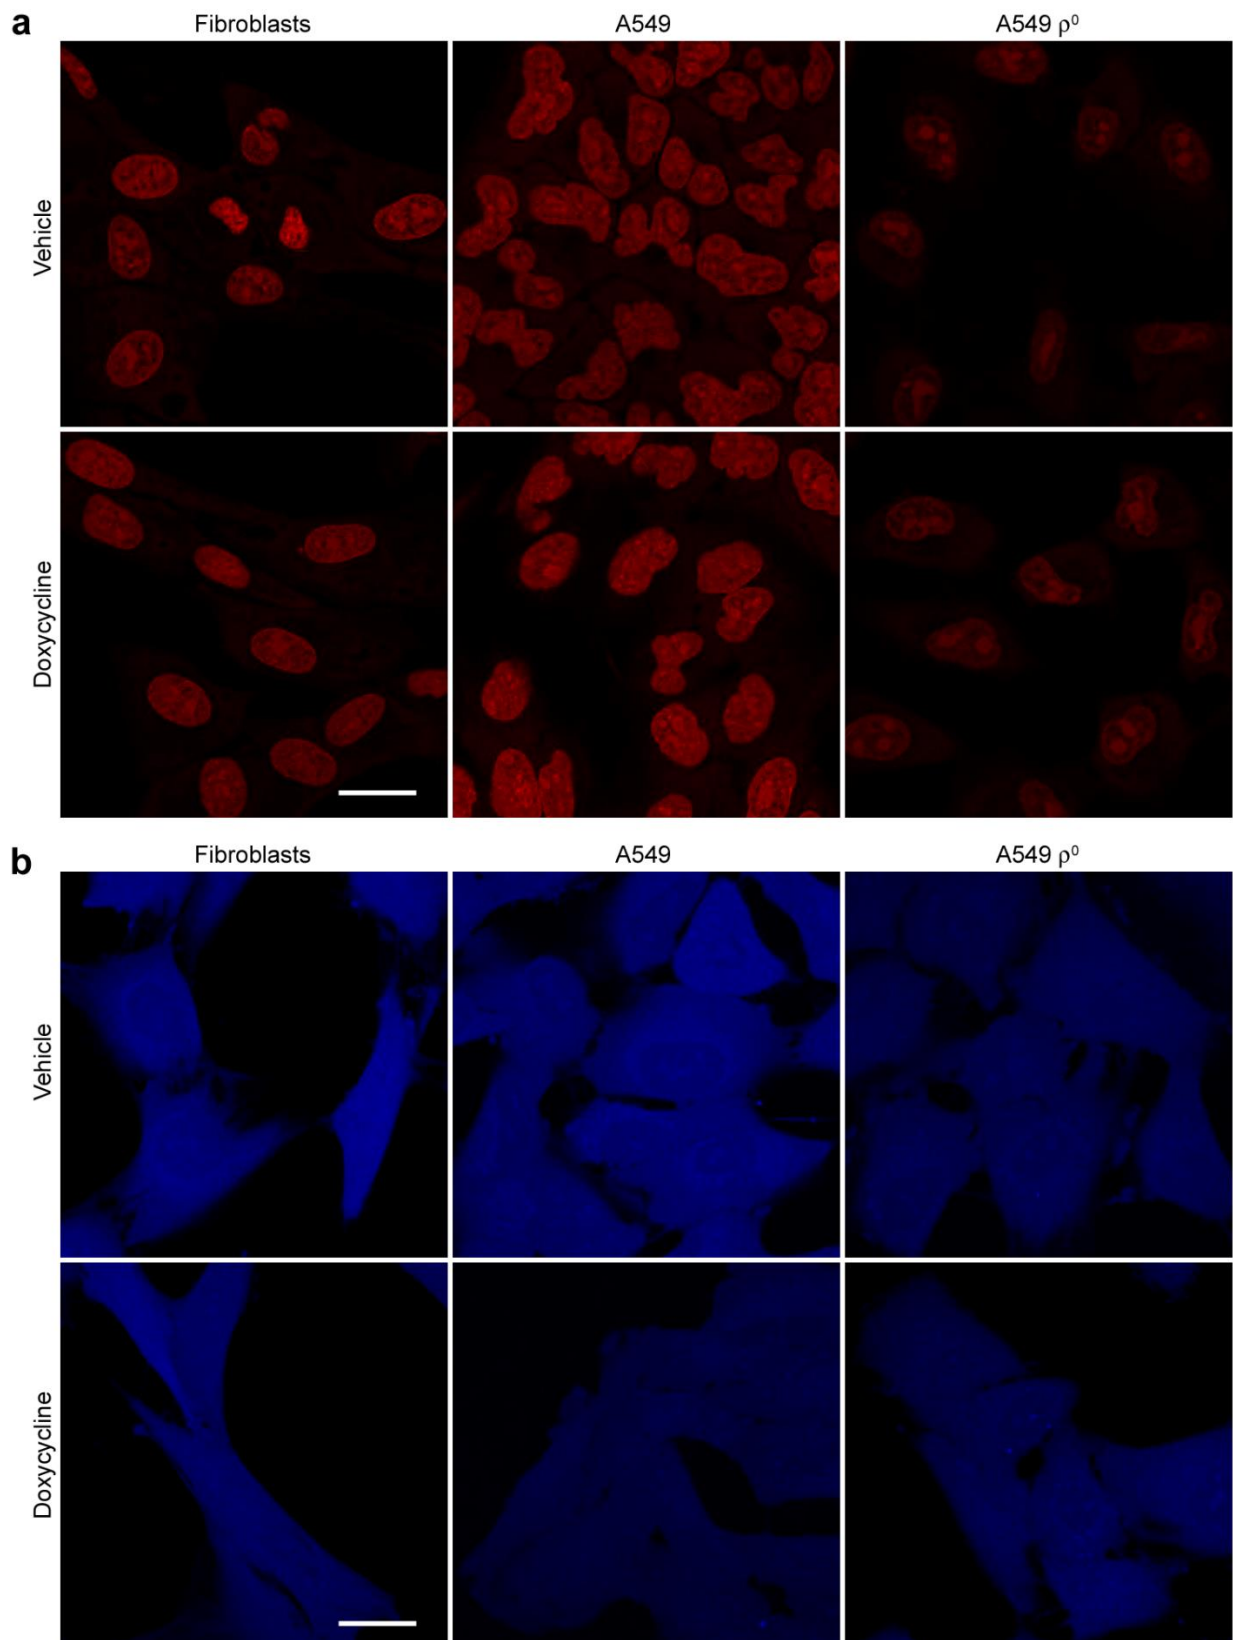

**Supplementary Figure S9.** (a) Representative fluorescent micrographs of DHE staining. Fibroblast, A549 and A549  $\rho^0$  cultures were treated with vehicle or doxycycline for 5 days, followed by staining with the ROS indicator dye DHE. (b) Representative fluorescent micrographs of mBCl staining. Fibroblast, A549 and A549  $\rho^0$  cultures were treated with vehicle or doxycycline for 5 days, followed by staining with the GSH indicator dye mBCl. Scale bars: 10  $\mu\text{m}$ .

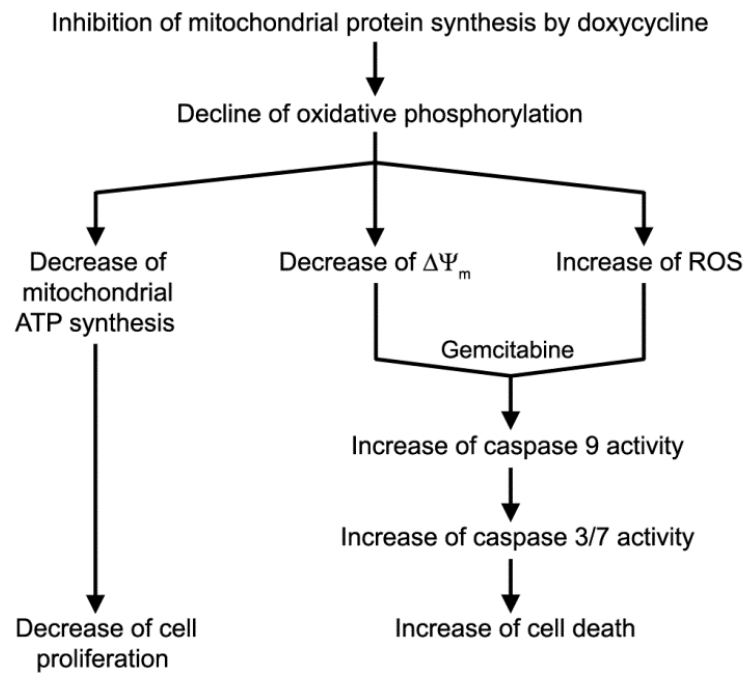

**Supplementary Figure S10.** Proposed impact of doxycycline and gemcitabine on cellular physiology and apoptosis. Doxycycline causes inhibition of mitochondrial protein synthesis. This impedes mitochondrial oxidative phosphorylation, which in turn leads to a decrease of mitochondrial ATP synthesis and  $\Delta\Psi_m$ , and an increase of ROS. These physiological changes reduce the cellular proliferation rate and lower the apoptotic threshold. When the cell is subsequently insulted by gemcitabine, caspase 9 is activated and activates caspase 3/7, resulting in apoptosis.

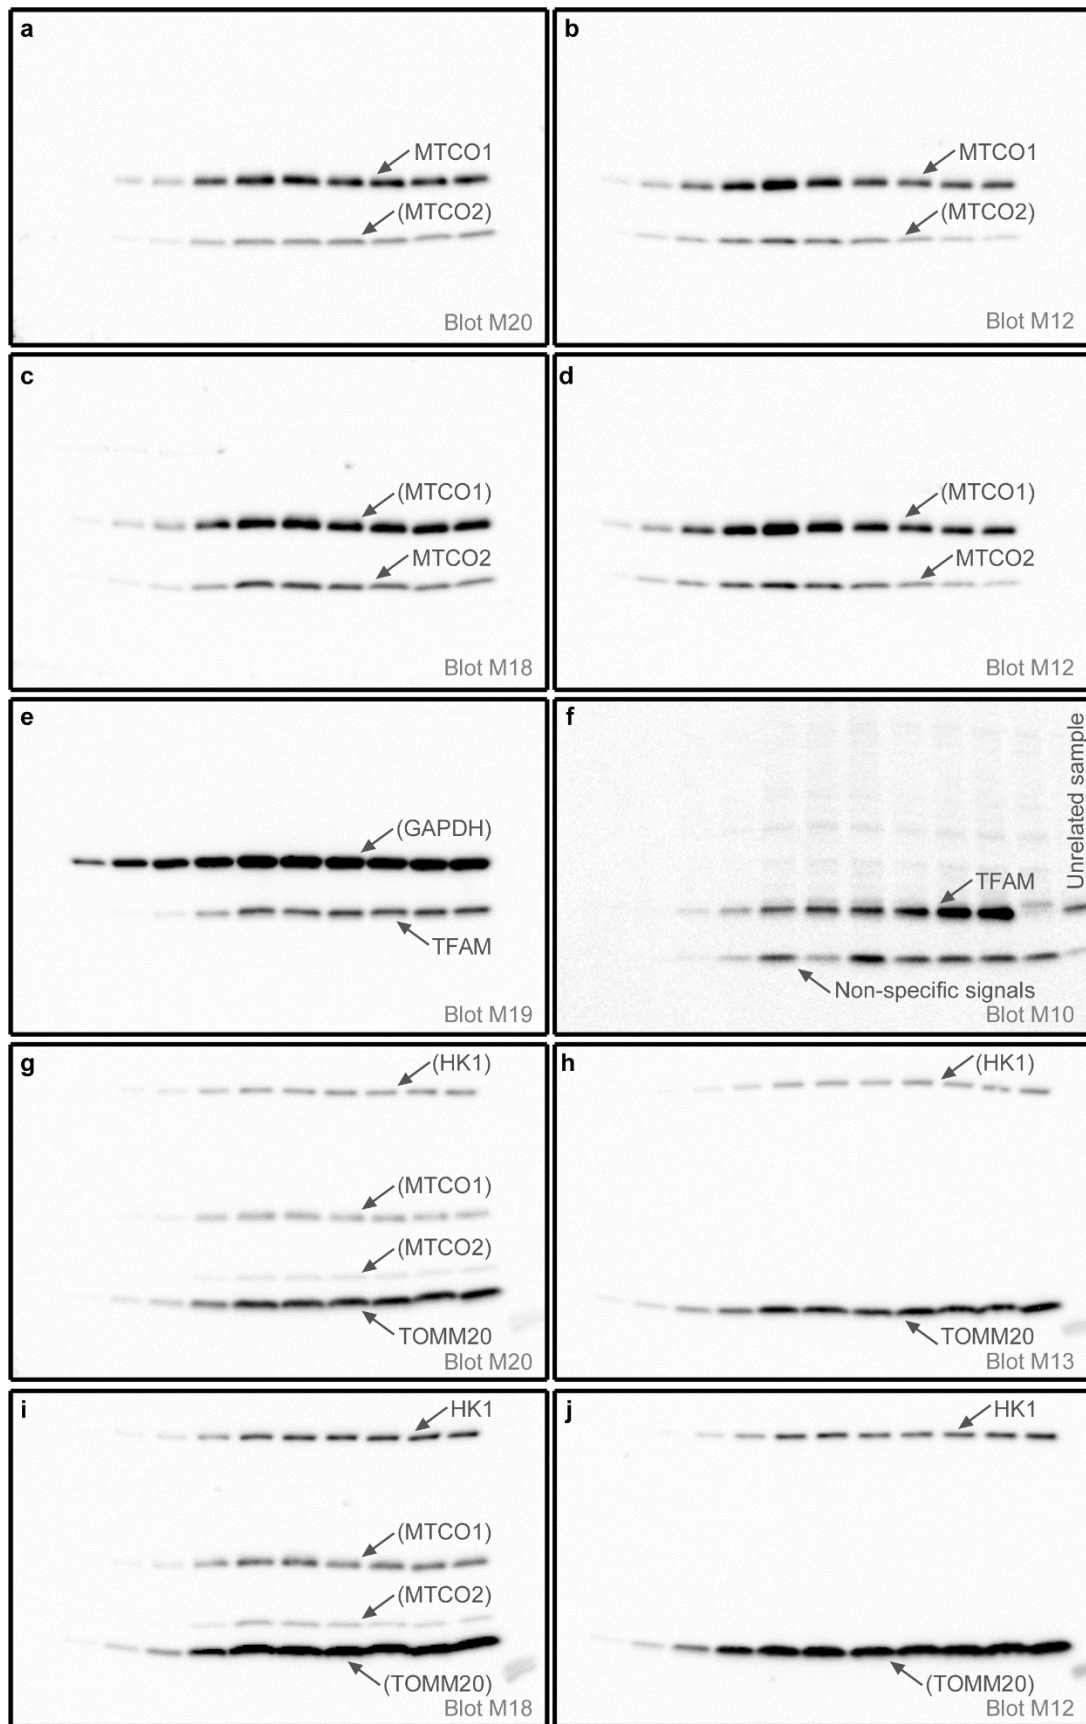

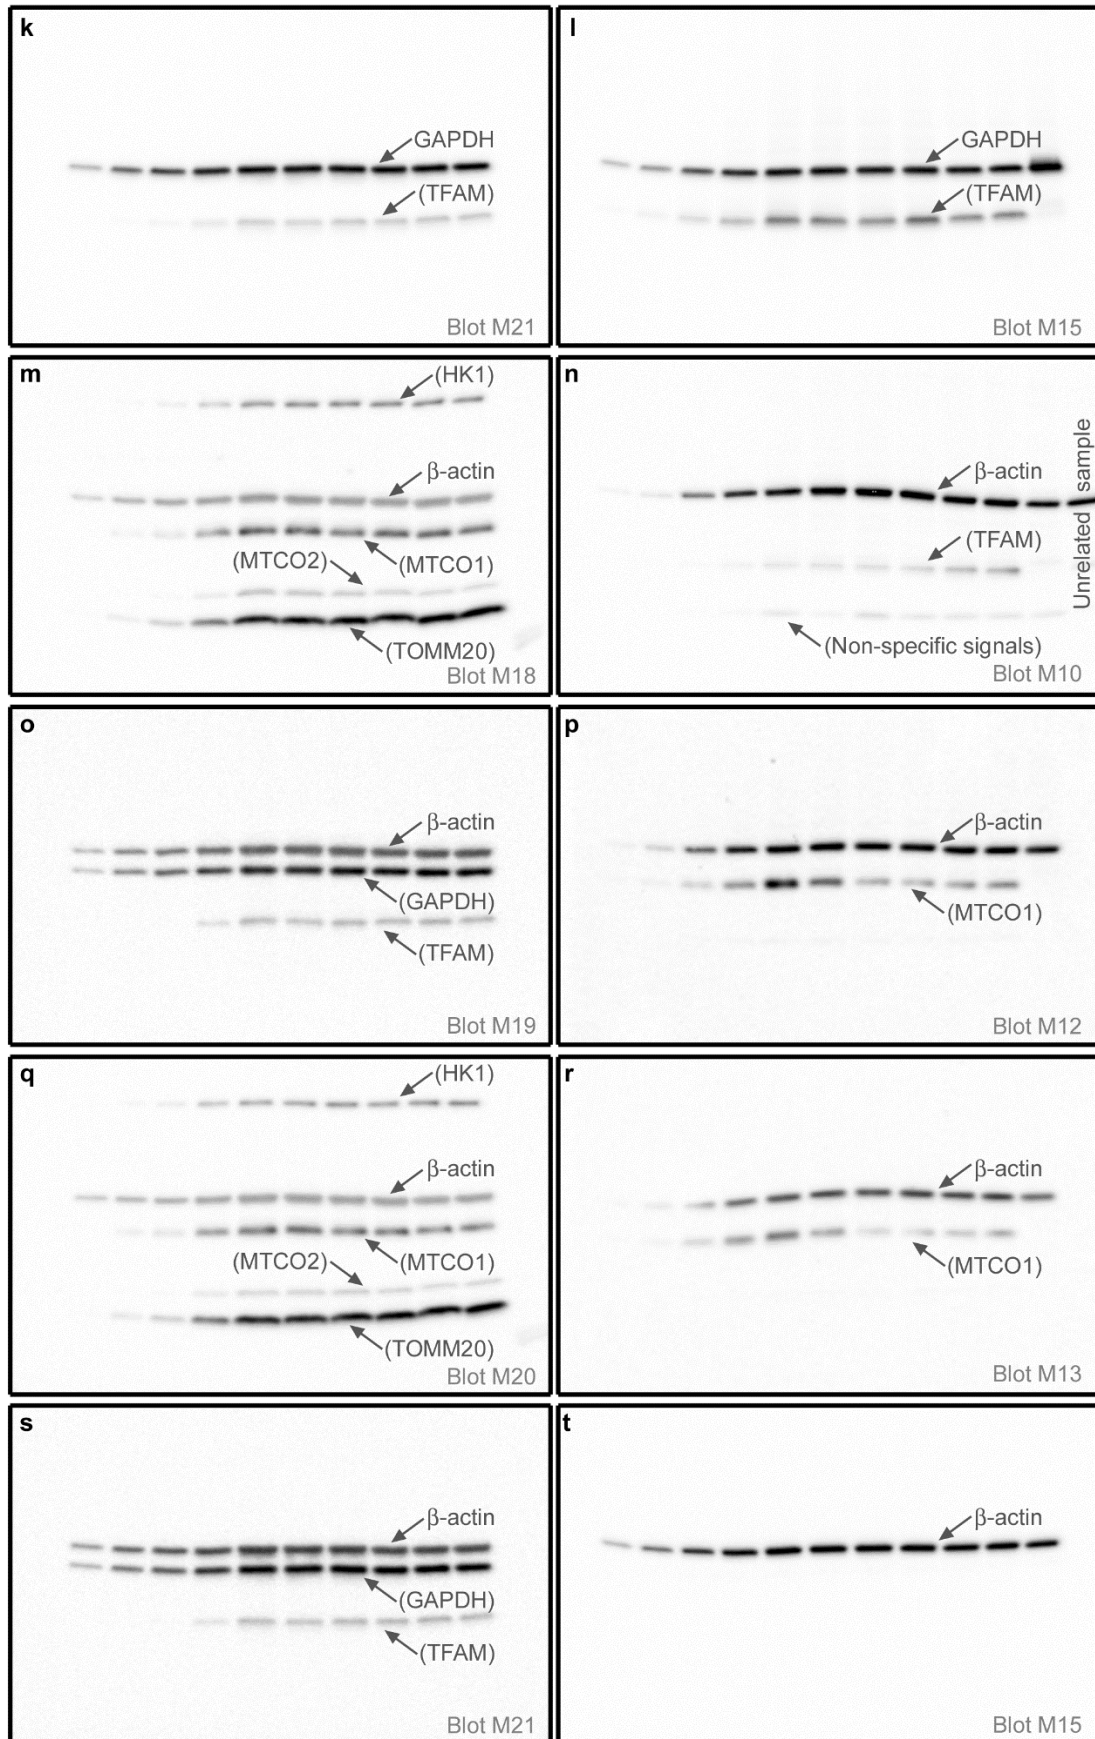

**Supplementary Figure S11.** Full-size of blots shown in Fig. 1c at exposure times that gave non-saturated signals used for quantification. Protein symbols in brackets indicate signals of co-probing or earlier probing. (a, c, e, g, i, k, m, o, q, s) Blots loaded with fibroblast samples and probed with (a) anti-MTCO1 antibodies, (c) anti-MTCO2 antibodies, (e) anti-TFAM antibodies, (g) anti-TOMM20 antibodies, (i) anti-HK1 antibodies, (k) anti-GAPDH antibodies and (m, o, q, s) anti- $\beta$ -actin antibodies. (b, d, f, h, j, l, n, p, r, t) Blots loaded with A549 cell line samples and probed with (b) anti-MTCO1 antibodies, (d) anti-MTCO2 antibodies, (f) anti-TFAM antibodies, (h) anti-TOMM20 antibodies, (j) anti-HK1 antibodies, (l) anti-GAPDH antibodies and (n, p, r, t) anti- $\beta$ -actin antibodies.

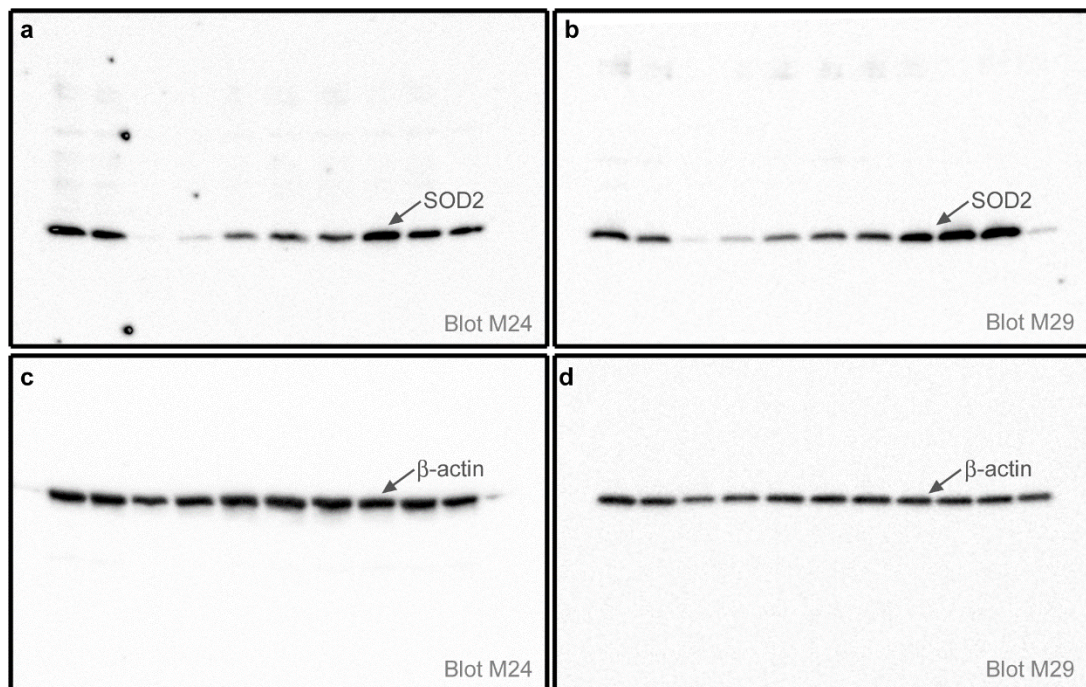

**Supplementary Figure S12.** Full-size of blots shown in Fig. 6a at exposure times that gave non-saturated signals used for quantification. (a, c) Blots loaded with fibroblast samples and probed with (a) anti-SOD2 antibodies and (c) anti- $\beta$ -actin antibodies. (b, d) Blots loaded with A549 cell line samples and probed with (b) anti-SOD2 antibodies and (d) anti- $\beta$ -actin antibodies.
